23 Bonner, 1998, Roze and Michod, 2001, Pfeiffer and Bonhoeffer, 2003, Rainey and Kerr,  
24 2010, Ratcliff et al., 2012, Hammerschmidt et al., 2014, De Monte and Rainey, 2014, Kaveh  
25 et al., 2016]. Natural selection promotes those organisms that perform this cycle in a more  
26 efficient way than others, as these produce more offspring per time. Surprisingly, even the  
27 simplest organisms demonstrate a great variety of reproduction modes: *Staphylococcus au-*  
28 *reus* produces independent propagule cells [Koyama et al., 1977], cyanobacteria filaments  
29 fragment into multicellular threads [Rippka et al., 1979] while *Gonium pectorale* disperses  
30 into independent cells [Stein, 1958]. These instances show that there is no universally opti-  
31 mal reproduction mode. Instead, the way how cell groups produce offspring is an adaptation  
32 to the environmental conditions and constrained by the biological properties of the organism  
33 [van Gestel and Tarnita, 2017].

34 One such property which can limit the possible life cycles is the group fragmentation  
35 cost. There is substantial evidence that reproduction is costly in natural populations. For  
36 example, during the fragmentation of a simple multicellular organisms, the release of cells  
37 requires the break of the cell matrix, which takes time and resources [Birkendal-Hansen,  
38 1995, Basbaum and Zena, 1996]. Also, not every cell may pass to the next generation of  
39 groups, for instance in slime molds cells forming the stalk of the colony die shortly after the  
40 spores are released [Bonner, 1959]. Another example are cells constituting the outer layer  
41 of a *Volvox carteri* colonies – these cells die upon the colony reproduction [Smith, 1944].  
42 Combined, this evidence shows that reproduction can be associated with a conspicuous cost.

43 There are only a few studies of the evolution of reproductive modes which explicitly  
44 take into account the fragmentation cost. Libby et al. [2014] modelled the evolution of life  
45 cycles of colonial forms of *Saccharomyces cerevisiae*. In their model, the fragmentation of  
46 tree-structured cell clusters was attributed to the death of cells. These cells become weak  
47 links and loose connections with neighbouring cells causing fragmentation of the cluster.  
48 However, while Libby et al. considered a detailed model of binary fragmentations of cell  
49 clusters, they did not investigate the whole range of fragmentation outcomes. In previous  
50 work, we have extensively analysed all possible ways of group fragmentation and found

51 evolutionary optimal life cycles under various fitness landscapes [Pichugin et al., 2017]. For  
52 costless group reproduction, only binary fragmentation, where a larger group splits into two  
53 parts, can be evolutionary optimal in terms of maximising population growth. The same holds  
54 for the case of proportional cost, where upon division into  $s$  parts,  $s - 1$  cells die. However,  
55 for fragmentation with a fixed cost in a form of a single cell loss, fragmentation modes with  
56 multiple offspring can become evolutionary optimal.

57 In this study, we investigate the influence of the fragmentation cost on the evolution of  
58 “staying together” life cycles [Tarnita et al., 2013]. We explicitly incorporate fragmentation  
59 costs arising from three scenarios: fragmentation delay, fragmentation risk and cell loss. We  
60 discuss the set of life cycles which can be evolutionary optimal for costly fragmentation.  
61 Then, we investigate how the distribution of optimal life cycles on a set of random fitness  
62 landscapes depends on the value of the fragmentation cost. Finally, we consider in detail  
63 those fitness landscapes in which the increase in a group size always reduces the perfor-  
64 mance of the group, i.e. the fastest growth and the best protection is achieved by independent  
65 cells. We show that even in these fitness landscapes that strongly disfavour multicellular  
66 groups, fragmentation costs can promote the evolution of life cycles involving the emergence  
67 of multicellular groups.

## 68 **2 Methods**

### 69 **2.1 Growth and death of groups**

70 We consider a population composed of unstructured groups (or complexes) of cells, which  
71 emerge, grow and fragment into offspring groups, thus completing the life cycle. Groups  
72 grow by dividing cells staying together after reproduction [Tarnita et al., 2013]. Due to the  
73 absence of any structure, the properties of a group are determined by its size  $i$  alone. We  
74 denote the abundance of groups of  $i$  cells in a population as  $x_i$ . We additionally assume that  
75 the size of groups in a population is bounded by  $n$ . Groups of size  $i$  have a death rate  $d_i$  and  
76 cells in a group have the division rate  $b_i$ , thus the growth rate of a group is  $ib_i$ . The vectors of

77 birth rates  $\mathbf{b} = (b_1, \dots, b_n)$  and of death rates  $\mathbf{d} = (d_1, \dots, d_n)$  define the fitness landscape  
78 of the model, see Fig. 1a.

## 79 **2.2 Group fragmentation**

80 New groups are produced by the fragmentation of existing groups. We further assume that  
81 the fragmentation occurs immediately after the growth of the group. Thus, upon each cell  
82 division, a group grows in size by one and either remains in this state until the next cell  
83 division, or splits into two or more smaller groups. As any group can be characterized by  
84 the number of cells comprising it, any fragmentation or growth can be characterized by a  
85 partition of this integer number. A partition is a way of decomposing an integer  $m$  into a sum  
86 of integers without regard to order, summands are called parts [Andrews, 1998]. We use the  
87 notation  $\kappa \vdash m$  to indicate that  $\kappa$  is a partition of  $m$ , for example  $2 + 2 \vdash 4$ , see Fig. 1b. The  
88 number of partitions of  $m$  grows fast with  $m$ . In the current study, we use  $n = 19$  and thus  
89  $m$  does not exceed 20. For  $m = 20$ , there are in total 2693 non-trivial partitions (with more  
90 than one part).

91 As example of using partitions to characterize fragmentation modes, consider a group  
92 of 2 cells in which the 3rd cell is born. If the group fragments without any cell dying, the  
93 product is either three independent cells (partition  $1 + 1 + 1 \vdash 3$ ) or a group of two cells  
94 and an independent cell (partition  $2 + 1 \vdash 3$ ). If a cell is lost upon fragmentation, the only  
95 possible result is two independent cells (partition  $1 + 1 \vdash 2$ ). In the absence of fragmentation,  
96 the product is the single group of three cells (the trivial partition  $3 \vdash 3$ ).

## 97 **2.3 Three way of implementing fragmentation costs**

98 We consider three qualitatively different scenarios that capture the fragmentation cost: frag-  
99 mentation delay, fragmentation risk, and fragmentation loss.

a) growth and death

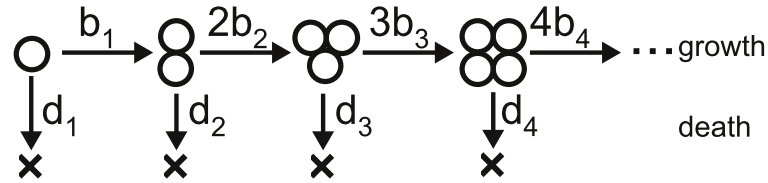

b) examples of fragmentation partitions

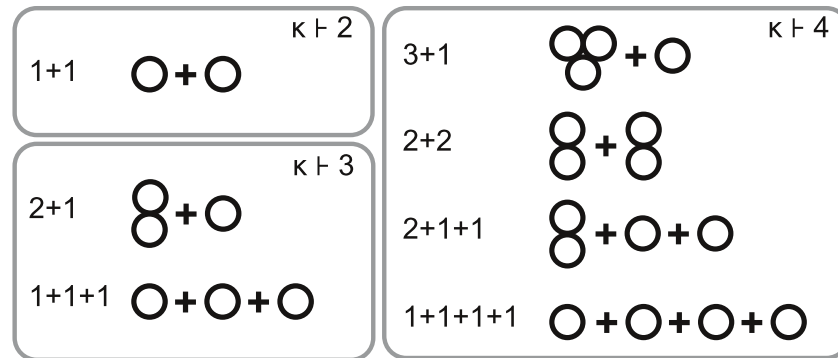

c) a pure life cycle with costly fragmentation

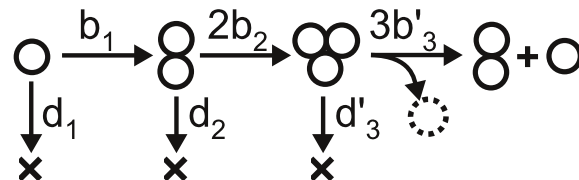

Figure 1: **Model of life cycles.** (a) The fitness landscape is defined by vectors of growth and death rates. Cells in a group of size  $i$  grow at rate  $b_i$  and groups die at rate  $d_i$ . (b) The fragmentation of groups is described by a partition of an integer number into a sum of integers. All possible fragmentations of groups of size 2, 3, and 4 are presented here. (c) In a deterministic life cycle, all groups follow the same partition at the fragmentation. For costly fragmentation, the growth rate at the maturity size may be smaller than prescribed by the fitness landscape  $b'_m \leq b_m$ , the death rate at the maturity size may be larger than prescribed by the fitness landscape  $d'_m \geq d_m$  and some cells may be lost upon the fragmentation (one cell in the illustrated case).

### 100 **2.3.1 Fragmentation delay**

101 In the case of the fragmentation delay, the process of fragmentation is not immediate and  
102 takes time  $T$ . This scenario covers situations where the fragmentation of the group requires  
103 the investment of resources, which otherwise would be spent on the further growth of the  
104 group. The transition time is inverse to the transition rate, thus we define the rate of fragmen-  
105 tation of a clusters of size  $m$  by

$$\begin{aligned} \frac{1}{mb'_m} &= \frac{1}{mb_m} + T, \text{ such that} \\ b'_m &= \frac{b_m}{1 + mb_m T} \leq b_m, \end{aligned} \quad (1)$$

106 where  $T$  it the fragmentation delay. Consequently, this scenario can be captured by changing  
107 the fitness landscape in terms of the birth rate at the size prior to fragmentation.

### 108 **2.3.2 Fragmentation with risk of death**

109 In the case of the fragmentation with risk, the organism expresses risky behavior prior to the  
110 fragmentation. For example, an organism could leave the shelter or break its shell in order to  
111 reproduce. Under this scenario, the risky behaviour increases the death rate at the final stage  
112 of the organism life cycle by  $R$

$$d'_m = d_m + R. \quad (2)$$

113 Again, this scenario corresponds to a change of the fitness landscape.

### 114 **2.3.3 Fragmentation with loss**

115 For fragmentation with loss,  $L$  cells die as upon the group fragmentation, thus the combined  
116 size of offspring groups is by  $L$  smaller than the size of the fragmented cell cluster. Under  
117 this scenario, the fragmentation followed by the growth from size  $m$  to  $m + 1$  is characterized  
118 by a partition  $\kappa \vdash m + 1 - L$ . We assume  $L$  to be constant, i.e. clusters loose the same number  
119 of cells independently on the partition of the parent group into offspring.

120 The three considered scenarios are not mutually exclusive, all three types of cost may be  
 121 present simultaneously. However, for simplicity of the presentation of results, we illustrate  
 122 each scenario of the fragmentation cost independently.

## 123 **2.4 Population dynamics under a deterministic life cycle**

124 For costless fragmentation, natural selection favours a narrow subset of life cycles, called  
 125 deterministic life cycles in [Pichugin et al., 2017], see Fig. 1c. In these life cycles, groups al-  
 126 ways grow up to some maturity size  $m \leq n$ , always fragment immediately after the  $m + 1$ -st  
 127 cell is born, and the fragmentation always follow the same pattern, given by a single parti-  
 128 tion. Also for costly fragmentation, natural selection promotes only deterministic life cycles,  
 129 see Appendix A.1. Thus, here we do not consider any life cycles other than deterministic  
 130 ones, where a life cycle would follow several paths, sometimes fragmenting in one way and  
 131 sometimes in another one.

132 Under a given deterministic life cycle, the state of a population can be described by abun-  
 133 dances of groups  $x_i$  of each possible size  $i$  from one cell to  $m$  cells given by the vector  
 134  $(x_1, x_2, \dots, x_m)$ . There are no groups of size  $m + 1$  or larger, because under determinis-  
 135 tic life cycle, any group fragments immediately after the next cell is born in a group of the  
 136 maturity size  $m$ .

137 The dynamics of the population state can be expressed in a form of the system of  $m$   
 138 differential equations: one equation for each particular size of groups. The change in the  
 139 number of groups of a given size is influenced by growth, death and fragmentation. This  
 140 leads to the set of equations

$$\frac{dx_1}{dt} = -b_1x_1 - d_1x_1 + \pi_1(\kappa)mb'_m x_m \quad (3a)$$

$$\frac{dx_i}{dt} = -ib_ix_i + (i-1)b_{i-1}x_{i-1} - d_ix_i + \pi_i(\kappa)mb'_m x_m \quad \text{if } 1 < i < m \quad (3b)$$

$$\frac{dx_m}{dt} = -mb'_m x_m + (m-1)b_{m-1}x_{m-1} - d'_m x_m + \pi_m(\kappa)mb'_m x_m, \quad (3c)$$

141 Here, Eqs. (3a) and (3b) describe the dynamics of the abundances of groups  $x_i$  that grow  
 142 without fragmentation, because they do not reach the maturity size  $m$ . The first two terms in  
 143 Eq. (3b)  $-ib_ix_i + (i-1)b_{i-1}x_{i-1}$  describe the change in  $x_i$  due to the group growth. The

144 next term  $-d_i x_i$  describes the death of groups. The last term  $\pi_i(\kappa) m b'_m x_m$  describes the  
 145 emergence of new groups of size  $i$  resulting from the fragmentation of mature groups. The  
 146 integer  $\pi_i(\kappa)$  is the number of groups of size  $i$  that emerge in a single act of fragmentation  
 147 according to the partition  $\kappa$ , and  $m b'_m$  is the growth rate prior to fragmentation (see Eq. (1)).

148 Eq. (3c) describes the dynamics of groups of maturity size  $m$ , which will inevitably frag-  
 149 ment according to the partition  $\kappa$  upon the next cell division. For fragmentation with de-  
 150 lay, the rate of transition to the next state (fragmentation) is smaller than the cell birth rate  
 151 ( $b'_m < b_m$ ) implied by the fitness landscape birth vector  $\mathbf{b}$  (see Eq. (1)). For fragmentation  
 152 with risk, the death rate is larger ( $d'_m > d_m$ ) than implied by the fitness landscape death vector  
 153  $\mathbf{d}$  (see Eq. (2)).

154 The equation system (3) is linear with respect to  $x_i$ . Thus, it can be written in a form of  
 155 matrix differential equation

$$\frac{d}{dt} \mathbf{x} = A \mathbf{x}, \quad (4)$$

156 where  $\mathbf{x} = (x_1, x_2, \dots, x_{m-1})^T$ , and matrix  $A$  is

$$A = \begin{pmatrix} -b_1 - d_1 & 0 & 0 & \cdots & \pi_1(\kappa) m b'_m \\ b_1 & -2b_2 - d_2 & 0 & \cdots & \pi_2(\kappa) m b'_m \\ 0 & 2b_2 & -3b_3 - d_3 & \cdots & \pi_3(\kappa) m b'_m \\ 0 & 0 & 3b_3 & \cdots & \pi_4(\kappa) m b'_m \\ \vdots & \vdots & \vdots & \ddots & \vdots \\ 0 & 0 & 0 & \cdots & \pi_m(\kappa) m b'_m - m b'_m - d'_m \end{pmatrix} \quad (5)$$

157 In the long run, the solution of Eq. (4) converges to that of an exponentially growing popula-  
 158 tion with a stable distribution, i.e.,

$$\lim_{t \rightarrow \infty} \mathbf{x}(t) = e^{\lambda t} \mathbf{w}. \quad (6)$$

159 The leading eigenvalue  $\lambda$  gives the total population growth rate, and its associated right eigen-  
 160 vector  $\mathbf{w} = (w_1, \dots, w_m)$  gives the stable distribution of group sizes. In the long term, the  
 161 fraction of groups of size  $i$  in the population is proportional to  $w_i$ . The leading eigenvalue  
 162 determines the evolutionary success of a population: In the competition of two populations



163 utilizing different life cycles (and hence different  $\lambda$ ), the one with larger growth rate will  
164 outcompete the other one. Thus, natural selection would promote the life cycle that provides  
165 the largest  $\lambda$ . We call this the evolutionary optimal life cycle.

166 To find the evolutionary optimal life cycle, it is necessary to find values of  $\lambda$  for all life cy-  
167 cles of interest. The leading eigenvalue  $\lambda$  is given by the largest solution of the characteristic  
168 equation

$$\det(A - \lambda \mathbf{I}) = 0. \quad (7)$$

169 For a given deterministic life cycle associated to fragmentation at size  $m$  according to the  
170 partition  $\kappa$ , the characteristic equation (7) reduces to (see Appendix A.2 for a derivation)

$$F_{m+1}(\lambda) + \Delta_m F_m(\lambda) - \frac{b'_m}{b_m} \sum_{i=1}^m \pi_i(\kappa) F_i(\lambda) = 0, \quad (8)$$

171 where

$$F_i(\lambda) = \prod_{j=1}^{i-1} \left( 1 + \frac{d_j + \lambda}{j b_j} \right). \quad (9)$$

172 The parameter

$$\Delta_m = \frac{m(b'_m - b_m) + d'_m - d_m}{m b_m} \quad (10)$$

173 characterises how costly fragmentation is in terms of risks and delays. In the absence of any  
174 costs, we have  $\Delta_m = 0$ . Eq. (8) is a polynomial equation of degree  $m$ . In general, we have  
175 to solve this equation numerically.

## 176 2.5 Random fitness landscapes

177 We now numerically investigate the distribution of optimal life cycles on two sets of fitness  
178 landscapes: random fitness landscapes and random detrimental fitness landscapes, which  
179 strongly disfavour groups. Both sets are explored by 10000 fitness landscapes generated only  
180 once and then used to assess all three scenarios: delay, risk, and loss. Within the scope  
181 of this study, we are interested in proportion of fitness landscapes promoting each of the  
182 classes of life cycles. The amount of collected data provides the relative accuracy about  
183  $\sqrt{10000}/10000 = 0.01$ , which is enough for our purposes.

184 In the set of random fitness landscapes, each element of the birth and death rates vector  
185 (**b** and **d**) was sampled independently from the uniform distribution  $U(0, 1)$ .

186 In the set of random detrimental fitness landscapes, for each landscape, we initially sam-  
187 pled two sequences of  $n = 19$  random numbers, each using the uniform distribution  $U(0, 1)$ .  
188 Then, the first sequence has been sorted in descending order to form the vector of the birth  
189 rates **b** and the second sequence has been sorted in ascending order to form the vector of death  
190 rates **d**. Thus, in all detrimental fitness landscape, the values of birth rates monotonically de-  
191 creased with the group size, while the values of death rates monotonically increased. There-  
192 fore, one could assume that life cycles that fragment at large group sizes only are strongly  
193 disfavoured.

## 194 **3 Results**

### 195 **3.1 Some life cycles cannot be evolutionary optimal under any fitness** 196 **landscape**

197 To find which life cycles can evolve for costly fragmentation we consider a large population  
198 of groups that can grow without constraint (see Section 2.4). The growth of any group is  
199 limited by the maximal group size  $n = 19$ . This leads to 2693 possible life cycles, one for  
200 each non-trivial partition of all integers not exceeding 20. The growth rate of a population  
201 with any given life cycle can be computed by solving Eq. (8). For each combination of the  
202 fitness landscape (Section 2.1) and the fragmentation cost (Section 2.3), one of the 2693 life  
203 cycles provides the largest growth rate and, thus, is evolutionary optimal.

204 For any fitness landscape, it is possible to find a life cycle which is evolutionary optimal  
205 under this fitness landscape. However, the opposite is not true: for some life cycles, it is  
206 impossible to find any fitness landscape under which it is evolutionary optimal. We label  
207 these life cycles “forbidden life cycles”. Consequently, we call a life cycle that is evolutionary  
208 optimal under some fitness landscape “allowed life cycle”.

209 It can be shown analytically that all three scenarios of the fragmentation cost (delay, risk  
210 and loss) lead to the same condition for a life cycle to be forbidden: the life cycle determined  
211 by the partition  $\kappa$  is forbidden if two different subsets of offspring with equal combined sizes  
212 exist, i.e. if two partitions  $\tau_1$  and  $\tau_2$  exist such as:

$$\tau_1 \vdash j, \tau_2 \vdash j, \tau_1 \neq \tau_2 \text{ and } \tau_1 + \tau_2 \subset \kappa, \quad (11)$$

213 For any fitness landscape and any fragmentation cost scenario, the life cycle employing such  
214 a partition is dominated by one of two life cycles in which one of the subsets occurs twice,  
215 while other one is not present, see Appendix A.3 for the proof.

216 The simplest example of the forbidden life cycle is the partition 2+1+1, which has two  
217 different offspring subsets: 2 and 1+1, both having the same combined size 2. It is always  
218 dominated either by a life cycle with partition 2+2 (subset 2 occurs twice) or by a life cy-  
219 cle with partition 1+1+1+1 (subset 1+1 occurs twice), see Fig. 2a for more examples. The  
220 proportion of forbidden life cycles rapidly increases with the partition sum (see black bars  
221 on Fig. 2b). Individually assessing each of considered 2693 partitions computationally, we  
222 found only 687 partitions corresponding to allowed life cycles (this is about a quarter of the  
223 total number).

224 The total amount of allowed life cycles is still too large to track each of them individually.  
225 Therefore, a classification is necessary. We focus on three significant subsets: binary frag-  
226 mentation, equal split and seeding, see also Fig. 2a. Binary fragmentation partitions have the  
227 form  $\kappa = a + b$ . Examples of binary partitions are 2+2 and 7+1. Binary fragmentation cover  
228 all scenarios where the parent group divides in two parts. Among the non-binary fragmenta-  
229 tion modes, we distinguish equal split and seeding partitions. Equal split partitions have the  
230 form  $\kappa = a + \dots + a + b$  such that  $a > b \geq 0$  and have more than two parts. Examples  
231 of equal splits are 1+1+1 and 3+3+3+2. Equal splits represent scenarios, where cells are  
232 evenly distributed among multiple offspring groups (plus a single smaller remainder group,  
233 if needed). Seeding partitions have the form  $\kappa = a + b + \dots + b$  such that  $a > b + \dots + b$ . Ex-  
234 amples of seeding are 3+1+1 and 7+2+2+2. Distinguishing the seeding fragmentation modes  
235 is inspired by seeding dispersal exhibited by biofilms, where a small portion of cells leaves

236 the parent group in an act of fragmentation.

237 All binary, equal split and seeding partitions are associated to allowed life cycles. How-  
 238 ever, not every allowed partition belongs to either of these three subsets. For instance, the  
 239 allowed partitions  $4+2+1$  and  $5+4+4$  do not belong to any of these classes. The proportion  
 240 of binary, equal split and seeding partitions among all allowed partitions decreases with the  
 241 partition sum, see Fig. 2b). For a system where groups may grow up to  $n = 19$ , there are  
 242 100 binary partitions, 90 equal split partitions, 110 seeding partitions and 387 other allowed  
 243 partitions, which do not belong to either of these three classes.

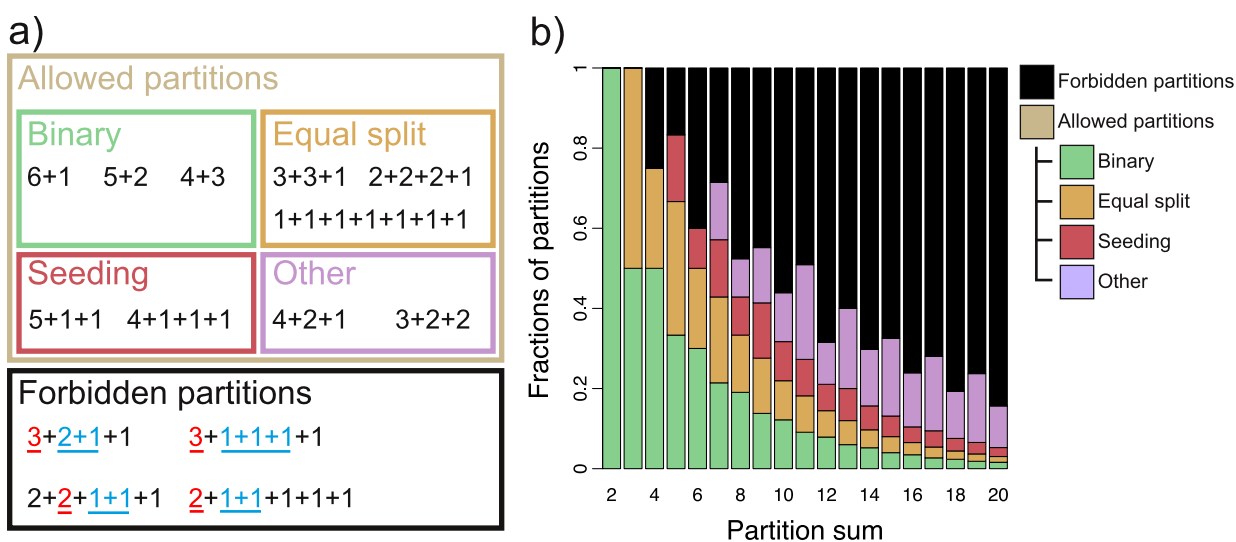

Figure 2: **Forbidden and allowed partitions.** (a) Allowed and forbidden partitions of 7. Allowed partitions are further broken into binary, equal, seeding, and other classes, according to the definitions in the main text. For each of forbidden partitions, a couple of different subsets of parts with the same sum are underlined (see Eq. (11)). (b) Proportion of forbidden and allowed partitions as a function of the partition sum. For partition sums 2 and 3 all partitions are allowed, starting from 4 some partitions are forbidden (for partition sum 4, it is  $2+1+1$ ). The proportion of forbidden partition grows rapidly with the partition sum. Among allowed partitions, the proportions of binary, equal split and seeding classes rapidly declines, consequently the other partitions constitute the majority of allowed fragmentation modes at large partition sums.

## 244 **3.2 Evolutionary optimal life cycles under random fitness landscapes**

245 The previous section introduced the range of potentially optimal life cycles, but it did not  
246 give any insight about interconnection between life cycles and fitness landscapes. Some life  
247 cycles may be evolutionary optimal under a larger set of fitness landscapes than others. To  
248 study the distribution of optimal life cycles for costly fragmentation, we generated a large  
249 set of 10000 random fitness landscapes (see section 2.5). For each fitness landscape from  
250 this set, we numerically computed the optimal life cycle independently for each of three  
251 scenarios of the fragmentation cost (delay, risk, or loss) under a range of cost values ( $T$ ,  $R$ ,  
252 or  $L$ , respectively).

### 253 **3.2.1 The average maturity size and the number of produced offspring increase with** 254 **the increase in fragmentation cost**

255 The average maturity size  $m$  at which fragmentation occurs and the average size of offspring  
256 groups are presented in Fig. 3 a-c. For all three scenarios of the costly fragmentation, the ma-  
257 turity size increases with the cost ( $T$ ,  $R$ , or  $L$ ). For our choice of  $n = 19$ , the average maturity  
258 size approaches  $\frac{n+1}{2} = 10$  with an increase in fragmentation delay ( $T$ ) and the variation ap-  
259 proaches  $\sqrt{\frac{n^2-1}{12}} = \sqrt{30}$  (see Fig. 3a), because the distribution of maturity sizes approaches  
260 a uniform distribution, see Appendix A.4. For fragmentation with risk, the average maturity  
261 size steadily grows with risk ( $R$ ), while the variation of maturity sizes slowly decreases (see  
262 Fig. 3b). For fragmentation with losses, the average maturity size steadily increases with  
263 cell loss ( $L$ ) and the variance decreases. At  $L = n - 1 = 18$  the maturity size is always  
264  $m = n = 19$ , see Fig. 3c.

265 Also, the number of offspring increases with the cost. For costless fragmentation, the  
266 optimal life cycle always produces exactly two offspring groups. With increasing costs, life  
267 cycles with fragmentation into multiple parts become optimal, and consequently, the number  
268 of produced offspring increases. For fragmentation with delay, the average size of offspring  
269 does not change significantly with delay ( $T$ ), see Fig. 3a. For fragmentation with risk, the  
270 average size of offspring decreases with risk ( $R$ ), see Appendix A.5. Combined with the

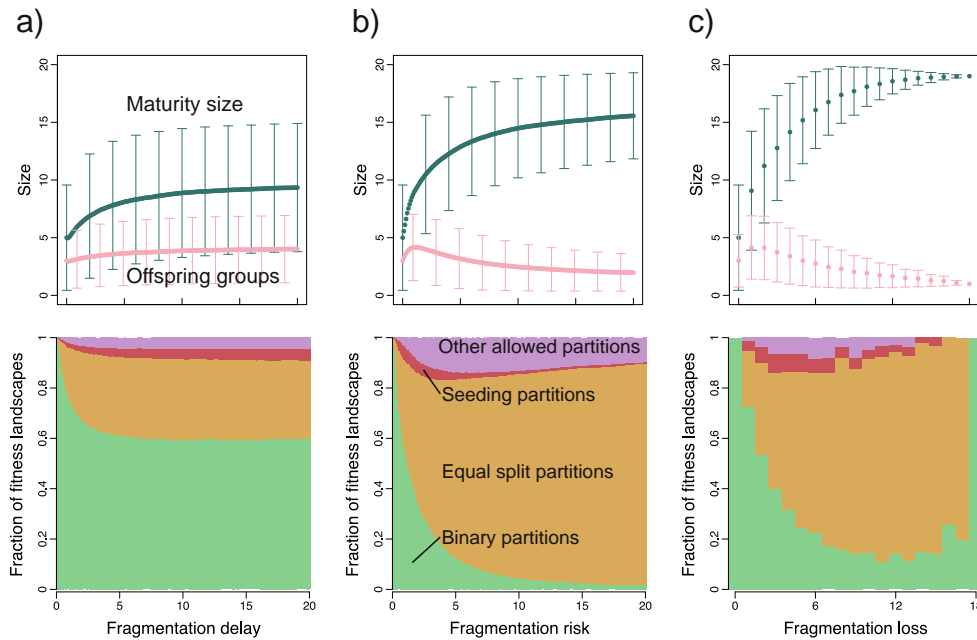

**Figure 3: Optimal life cycles for costly fragmentation.** The top panels present maturity and average offspring sizes in optimal life cycles as a function of the fragmentation cost for a) fragmentation with delay, b) fragmentation with risk and c) fragmentation with cell loss, respectively. Points depict the average value, error bars represent one standard deviation. The bottom panels show the fractions of each of binary fragmentation, equal split, seeding, and other allowed partitions as functions of fragmentation cost for the same scenarios of fragmentation cost. While the binary and equal split transitions constitute relatively small portion of available partitions, the corresponding life cycles have high probability to be evolutionary optimal. The increase in fragmentation loss reduces the amount of available life cycles, especially at large  $L$ . Thus, the fraction of life cycles classes at the panel c) does not change smoothly with the fragmentation loss.

271 increase in the maturity size, this leads to an increase in the number of offspring produced  
272 at the fragmentation event. For fragmentation with loss, the size of offspring monotonically  
273 decreases with loss ( $L$ ) and therefore, the offspring number initially increases with loss.  
274 However, the number of offspring declines at large  $L$ , because this number cannot exceed  
275 the number of surviving cells, which is limited by  $n - L + 1$ . In our model the number of  
276 produced offspring returns to 2 at  $L = 18$ .

### 277 **3.2.2 Equal split and binary fragmentation life cycles are overrepresented for random** 278 **fitness landscapes**

279 The proportions of different classes of partitions among optimal life cycles change with the  
280 fragmentation cost ( $T$ ,  $R$ , or  $L$ ), see Fig. 3 a-c.

281 If reproduction is costless, only binary partitions can be evolutionary optimal [Pichugin  
282 et al., 2017]. At low reproduction costs, binary partitions remain the most abundant class  
283 under any scenario of cost implementation. With an increase in costs, the fraction of fitness  
284 landscapes promoting binary fragmentation declines. For reproduction with delay, this frac-  
285 tion stabilizes at about 60% (see Fig. 3a), while for reproduction with risk, it falls below 5%  
286 (see Fig. 3b). For fragmentation with loss, the binary fragmentation increase in abundance  
287 up to  $L \approx 15$  on, see Fig. 3c. This is connected to the decrease in the number of available  
288 partitions once the fragmentation loss become compatible with the maximal available group  
289 size  $L \sim n$  (such as at  $L = 18$ , the only possible partition is 1+1, which is a binary one).

290 Equal split fragmentations constitute another major class of observed reproduction modes.  
291 For reproduction with risk and with (moderate) losses, equal splits are evolutionary optimal  
292 for the vast majority of fitness landscapes. For reproduction with delay, equal splits are the  
293 second most abundant class of optimal life cycles. Equal splits are promoted by natural se-  
294 lection, because they maximize the number of offspring groups per act of fragmentation and  
295 thus share the cost among the largest number of offspring groups.

296 Seeding and other fragmentation modes contribute only a small portion of optimal life  
297 cycles in all three scenarios of reproduction cost. For reproduction with delay and loss, both

298 these classes are evolutionary optimal at roughly the same proportions of fitness landscapes  
299 ( $\sim 5\%$ ). Given that there is a much smaller number of seedings than other partitions, see  
300 Fig. 2b, seeding partitions are less suppressed by fragmentation with delay and loss than  
301 other partitions. For reproduction with risk, seeding partitions are much less abundant than  
302 other partitions.

### 303 **3.3 Fragmentation cost can drive the formation of multicellular groups**

304 Multicellular groups evolve when the existence of cells in a group provides some benefit,  
305 expressed for example in a form of better resource acquisition or protection from external  
306 threats. However, for costly group fragmentation, even when existence in groups is detri-  
307 mental to cells comprising them, formation of multicellular groups may be evolutionary ben-  
308 efitial: We have constructed a set of 10000 random detrimental fitness landscapes (see Sec-  
309 tion 2.5). For each of them, the death rate increases monotonically with the size of group,  
310 while the birth rate monotonically decreases with the group size. For costless fragmentation,  
311 the optimal life cycle for all detrimental fitness landscapes is unicellular, i.e. uses the par-  
312 tition  $1 + 1$ . With the increase in the value of the fragmentation cost ( $T$ ,  $L$  or  $R$ ), other –  
313 multicellular – life cycles become optimal (see Fig. 4). For all detrimental fitness landscapes  
314 and all scenarios of the fragmentation cost, all observed optimal life cycles are equal splits in  
315 the form  $1 + 1 + \dots + 1$  (see Fig. 4a-c). The intuition behind this behaviour is that a soli-  
316 tary cell is the most effective state available to the population under the detrimental fitness  
317 landscapes, since solitary cells have the largest growth and the lowest death rate among all  
318 possible groups sizes.

## 319 **4 Discussion**

320 A key factor considered in the present study is the cost of reproduction – an act of making  
321 offspring results in less net biomass than the growth without reproduction. How much is it the  
322 case for the natural populations? A number of evidences from observations and experimental



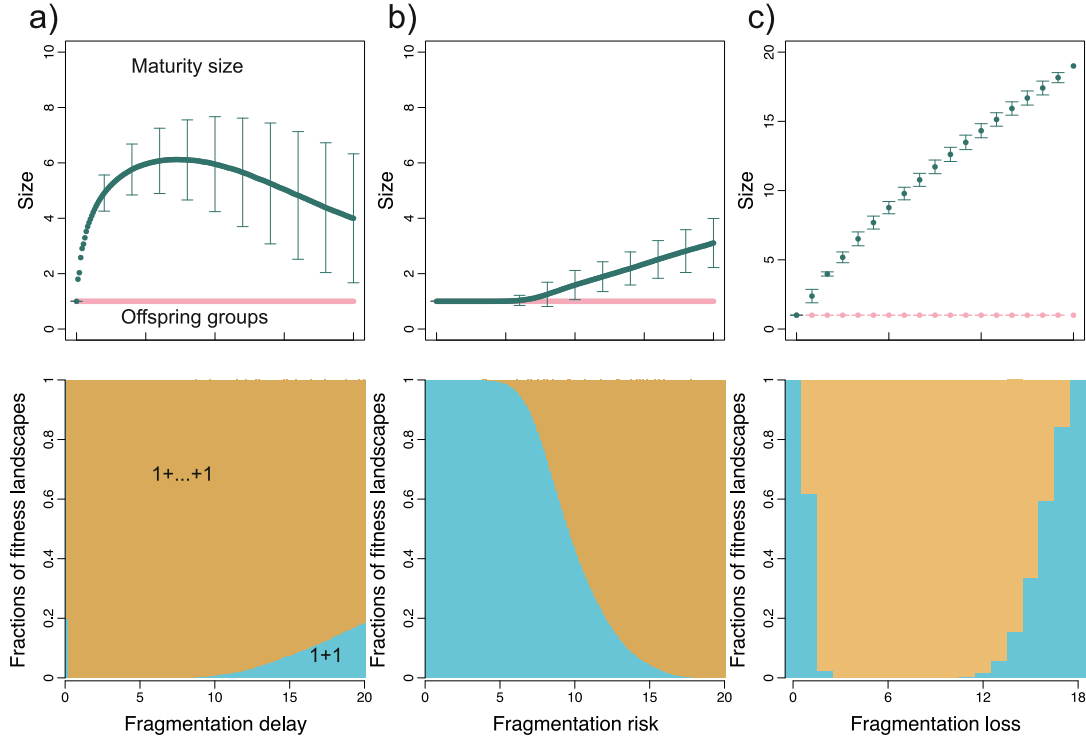

**Figure 4: Fragmentation cost can drive the evolution of multicellular groups in detrimental fitness landscapes.** The top panels show the average size of the parental and offspring groups in optimal life cycles as a function of fragmentation cost for a) fragmentation with delay, b) fragmentation with risk and c) fragmentation with cell loss, respectively. Points show the average value, error bars represent one standard deviation. The set of fitness landscapes is given by monotonic random sequences (see main text). The size of offspring groups is strictly one, which means that all observed equal split fragmentations had all offspring being independent cells. The bottom panels shows the fractions of unicellular (1+1) and multicellular modes of fragmentation. At no cost, all detrimental fitness landscapes promote the unicellular life cycles. For fragmentation with delay, the fraction of unicellular life cycles rapidly decreases and approaches zero at  $T = 0.3$ . However, starting from  $T \approx 5.9$  unicellular life cycles become sometimes optimal again. For fragmentation with risk, multicellular life cycles are not observed below  $R \approx 3.9$ . Nevertheless, by  $R \approx 18.9$  under all fitness landscapes, the optimal life cycles become multicellular. For fragmentation with loss, the partition 1+1 corresponds to the fragmentation at the minimal possible size. The proportion of fitness landscapes promoting the partition 1+1 decreases rapidly. However, the number of available fragmentation partitions decreases with  $L$  such as at  $L = 18$  the only possible partition is 1+1.

323 studies shows that reproduction can be indeed costly. Such a costs come in different forms.  
324 For instance, consider streptococcus bacteria, which naturally forms cell chains held together  
325 by cell walls. To fragment, these cell walls must be broken and the process of unchaining  
326 requires the expression of autolysin [Lominski et al., 1958, Shaikh and Stewart-Tull, 1975,  
327 Mou et al., 1976]. Autolytic-defective mutants unable to fragment and form long chains  
328 [Soper and Winter, 1973, Shungu et al., 1979]. The necessary investment of resources into  
329 autolysin production constitutes the cost of group fragmentation in this case (represented by  
330 the scenario of fragmentation with delay in our model).

331 Another example is seeding dispersal in bacterial biofilms. Here, the biofilm composed  
332 of mostly sessile cells develop cavities filled with motile cells, who are then released into  
333 the environment [Webb et al., 2003a, McDougald et al., 2012, Claessen et al., 2014]. To  
334 develop cavities and motile cells, the biofilm changes its structure [Purevdorj-Gage et al.,  
335 2005], which inevitable bears an investment costs. Moreover, to free up the space for motile  
336 cells and provide nutrients for the differentiation, cells in the cavity die [Tolker-Nielsen et al.,  
337 2000, Webb et al., 2003b]. Therefore seeding in biofilms is related not to one but to two  
338 scenarios of reproduction cost considered in our model.

339 A unique mechanism of group fragmentation has been developed by *S. cerevisiae* colonies  
340 in experimental evolution studies [Ratcliff et al., 2013, 2014]. There an initially unicellular  
341 budding yeast was subjected to the selection regime favouring formation of cell clusters.  
342 Evolved clusters have a tree-like structure. To facilitate a fragmentation, a single cell in the  
343 centre of the tree dies, thus, the integrity of the tree cannot be maintained and eventually  
344 the colony breaks into several smaller parts. The death of cell is fragmentation cost in this  
345 example. While not being a natural world example, this organism shows that in the need  
346 of developing an efficient group fragmentation mode, evolution readily accepts the incurring  
347 reproduction costs.

348 Comparing our results with the case of costless fragmentation considered in Pichugin  
349 et al. [2017] suggests that the evolution of life cycles involving fragmentation into multi-  
350 ple parts may be linked with costly group reproduction. Whether this is an actual driving

351 force of evolution in natural populations is an open experimental question. Nevertheless, we  
352 can consider known cases of fragmentation into multiple parts and assess whether a group  
353 reproduction is associated with any costs.

354 The first example is the bacterium *Metabacterium polyspora*, inhabiting the gastrointesti-  
355 nal tract of guinea pig. The life cycle of this bacterium involves repeatable passages through  
356 the tract of multiple hosts. In order to survive such a process, multiple endospores are pro-  
357 duced within a single cell [Angert and Losick, 1998], see Fig. 5a). Up to nine endospores  
358 can be formed in a single bacterial cell, which make this life cycle a clear example of a frag-  
359 mentation into multiple parts. The most apparent cost of reproduction in *M. polyspora* is that  
360 the maternal cell is discarded after the release of endospores. Moreover, the formation of  
361 endospores in bacteria is significantly different from the normal binary cell division, since  
362 the resulting object must survive through much higher stress than the parent cell [Nicholson  
363 et al., 2000]. Thus, in addition to the normal machinery involved in DNA replication and cell  
364 division, a number of additional processes are involved in production and maturation of the  
365 endospore (reviewed in [Angert, 2005]). These processes contribute additional costs of the  
366 reproductive event.

367 Another example is a group of segmented filamentous bacteria [Davis and Savage, 1974],  
368 where colonies release two independent cells that grow into new colonies. This reproduction  
369 mode can be described by the partition  $x + 1 + 1$ , i.e. it corresponds to the seeding class. The  
370 colony of segmented filamentous bacteria originates as a single holdfast-bearing cell, which  
371 is capable to attach to the host epithelium. Once this cell settles down, it begins to grow and  
372 divide, forming the colony. Since the epithelium is repeatedly renewed tissue, colonies have  
373 to give rise to new colonies. This requires production of new holdfast-bearing cells. These  
374 cells emerge in a process somewhat similar to the production of endospores - asymmetric  
375 division with consequent engulfment of a smaller daughter cell by the larger one. Notably,  
376 once the new holdfast-bearing cells have matured, the cell containing them undergoes lysis in  
377 order to release them into the gastrointestinal tract, see Fig. 5b). Thus, these organisms pay a  
378 similar cost of reproduction.

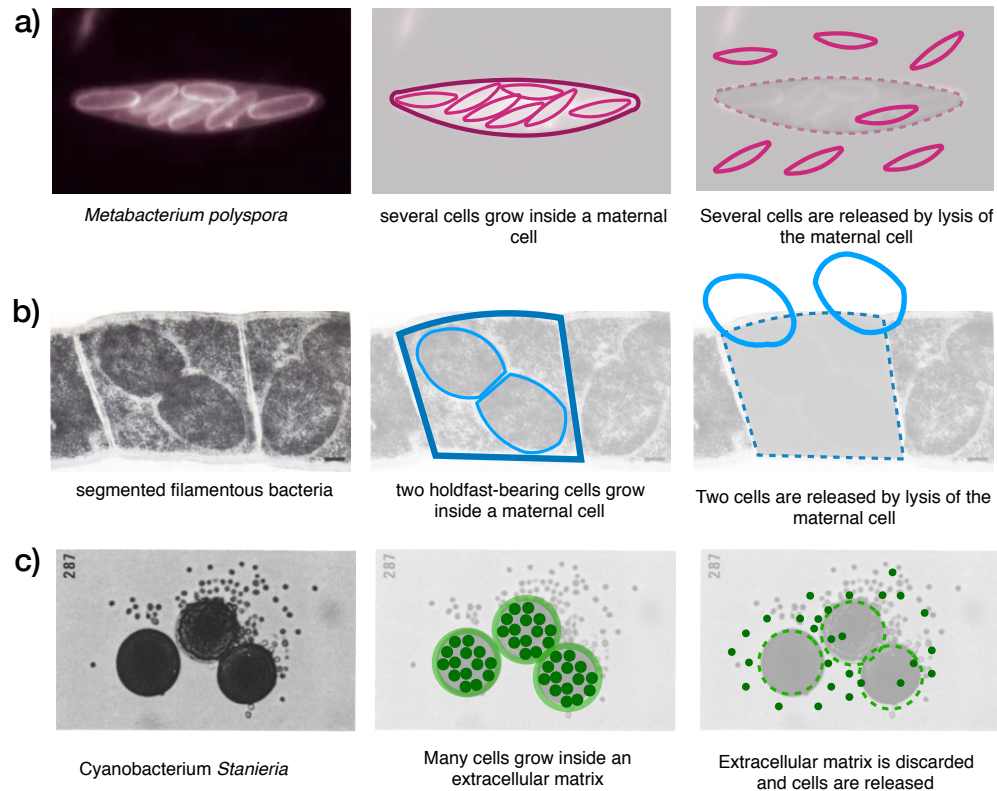

Figure 5: **Examples of multiple fragmentation in nature and their interpretation by means of our model.** a) *M. polyspora* grows multiple endospores, released after the maternal cell lysis (picture adopted from [Angert and Losick, 1998]). From the viewpoint of our approach, a group of size  $x + 1$  loses one cell and fragments into  $x$  groups of one cell each. b) segmented filamentous bacteria grows two holdfast-bearing cells inside a maternal cell. These cells are released in the result of the maternal cell lysis (picture adopted from [Davis and Savage, 1974]). From the viewpoint of our approach, a group of size  $x + 2$  loses one cell and fragments according to the partition  $(x - 1) + 1 + 1$ . c) genus *Stanieria* grows multiple cells within a single body of extracellular matrix. These cells are released simultaneously upon the break of the matrix (Picture adopted from [Waterbury and Stanier, 1978]). From the viewpoint of our approach, a group of size  $x$  fragments into  $x$  groups of one cell each, losing the extracellular matrix, which production required a prior investment of resources.

379 An example for an organism with fragmentation cost in a form other than cell loss is  
380 the *Stanieria* genus of cyanobacteria. These organisms are born as independent cells. In the  
381 course of their life, these cyanobacteria continuously produce an extracellular matrix, which  
382 helps the organism to attach to solid surfaces. Shortly before the reproductive event, the cells  
383 undergo a rapid succession of fissions, producing between 4 and 1000 cells. Then, the ex-  
384 tracellular matrix gets broken, releasing multiple offspring at once [Waterbury and Stanier,  
385 1978], see Fig. 5c. In this case, the fragmentation cost comes in the form of the lost extra-  
386 cellular matrix, which protected and sustained the parent organism, but is not transferred to  
387 the offspring cells. The production of the extracellular matrix is distributed across the whole  
388 lifespan of the organism, therefore, this scenario lays outside of the scope of the current  
389 model, where the cost is assumed to be paid at the last step of the organism's life. Never-  
390 theless, the combination of multiple fragmentation in *Stanieria* and the apparent costs of the  
391 reproduction qualitatively support our hypothesis that fragmentation costs can drive life cycle  
392 evolution.

393 Other notable examples of multiple fragmentation, which are even further away from our  
394 model are algae *Gonium pectorale* and slime molds. *G. pectorale* also undergoes sexual  
395 reproduction, which violates the assumption of asexual reproduction in our model. Slime  
396 molds colonies are formed by aggregation of cells and not by the growth of previous member  
397 of the colony. Still, both organisms exhibit fragmentation into multiple parts and significant  
398 fragmentation costs. *G. pectorale* spends the majority of its life cycle in a form of 16-cell  
399 colony. At the fragmentation, the colony dissolves into 16 independent cells, which originate  
400 new colonies [Stein, 1958]. Since the maturity size for *G. pectorale* is 16 cells, but the frag-  
401 mentation does not immediately follow the moment of the reaching this size, this organism  
402 has an explicit delay of fragmentation. Slime molds, which are popular model organisms  
403 in studies on the evolution of cooperation, form a slime composed of multiple cells. The  
404 slime further differentiates into fruiting body containing multiple spores and stalk needed to  
405 provide some height to the fruiting body, so spores can be distributed across larger territory  
406 [Bonner, 1959]. Cells in the stalk die without contributing to the spores, thus the stalk is

407 the cost of the fragmentation. Both organisms, support the hypothesis as well, but only on a  
408 conceptual level.

409 Another aspect of our study is that all three considered scenarios of the fragmentation  
410 cost share the same set of potentially optimal life cycles. For fragmentation with delay, risk  
411 and cell loss, only these life cycles, which partitions do not contain two different partitions  
412 with the same sum, can be evolutionary optimal. Given the difference between the ways how  
413 the considered costs affect the life of a single organism in a population, this result is striking.

414 For costless fragmentation and fragmentation with proportional costs, only binary frag-  
415 mentation can be evolutionary optimal [Pichugin et al., 2017], which vastly reduces the num-  
416 ber of possible life cycles. For instance, if the group size limited by  $n = 19$ , there are only 99  
417 binary fragmentations which can evolve for costless fragmentation. The introduction of the  
418 fixed fragmentation cost expands the space of optimal life cycles. For costly fragmentation,  
419 the number of potentially optimal life cycles is almost 7 times larger: 687.

420 Among all potentially optimal life cycles, we discriminate two special classes: binary  
421 fragmentation and equal split. They constitute only a small fraction of all allowed life cycles,  
422 see Fig. 2b. However, these two narrow classes of fragmentation modes are evolutionary  
423 optimal under majority of random fitness landscapes for all three scenarios of the fragmenta-  
424 tion cost, see Fig. 3. Among the natural bacterial populations and simple eukaryotic species,  
425 binary fission is the dominant mode of reproduction (see [Angert, 2005]). The majority of  
426 species, which utilize the fragmentation into more than two parts, do it by fission in multiple  
427 unicellular propagules, as discussed above. A notable exception is the reproduction mode  
428 of segmented filamentous bacteria [Davis and Savage, 1974] (see above). Thus, binary frag-  
429 mentation and equal split are not only promoted by our model, but also relatively widespread  
430 in nature.

431 The evolution of groups from unicellular ancestors is often considered to be driven by  
432 some ongoing benefits provided by the group membership such as better protection [Stanley,  
433 1973], access to novel resources [Rainey and Travisano, 1998] and the opportunity to coop-  
434 erate (reviewed in [Kaiser, 2001] and in [Grosberg and Strassmann, 2007]). In our work we

435 have shown that such ongoing benefits of being in a group are not a necessary condition for  
436 the evolution of groups. Another, previously overlooked factor capable to drive the evolution  
437 of groups is the cost regularly paid at each reproduction event. The impact of the reproduction  
438 cost is strong enough that it may promote formation of multicellular groups even if the group  
439 living put cells in disadvantage comparing with solitary existence. Two factors contribute  
440 to this effect. First, the growth to larger size takes more time and thus makes reproduction  
441 less frequent, so the cost per time unit is smaller. Second, larger group size at fragmentation  
442 makes it possible to share the burden of reproduction cost among more units. This reduction  
443 of the impact of the reproduction cost is previously overlooked factor, which promotes the  
444 formation of multicellular groups.

445       Given the fascinating diversity of biological life cycles observed even in simple organ-  
446 isms, it seems daunting to use theoretical models to understand their features. However, our  
447 approach shows that even simple models can capture key aspects of this process and pro-  
448 duce results for a whole variety of life cycles. At the same time, these models point towards  
449 fragmentation costs as potential drivers of this diversity.

## 450 **5 Acknowledgements**

451 We are grateful to David Rogers and Philippe Remigi for fruitful discussions and biological  
452 insights.

## 453 **A Appendix**

### 454 **A.1 Only deterministic fragmentation modes can be evolutionary opti- 455 mal under any fitness landscape**

456 Following Pichugin et al. [2017], the state of the population can be described by the vector  $\mathbf{x}$ ,  
457 where  $x_i$  denotes the abundance of groups of size  $i$ . All processes changing the state vector  
458  $\mathbf{x}$  – birth, death and fragmentation – occur with a constant rate. Thus, the dynamics of the



459 population state can be described by a set of linear differential equations or, equivalently, by  
460 a matrix differential equation

$$\dot{\mathbf{x}} = A\mathbf{x}, \quad (12)$$

461 where  $A$  is a projection matrix defined by demographics of the population [Caswell, 2001].  
462 An element  $a_{i,j}$  of the projection matrix describes the rate of change of the number of groups  
463 of size  $i$  caused by processes occurring with groups of size  $j$ .

464 To construct the projection matrix elements, consider groups of a certain size  $j$ . We  
465 denote by  $q_{j,\kappa}$  the probability that upon the growth from size  $j$  to  $j + 1$ , the group will  
466 fragment by a partition  $\kappa \vdash j' \leq j + 1$  (where the “ $\leq$ ” indicates that cells can be lost  
467 upon fragmentation). Among these partitions we distinguish the trivial partition of  $j + 1$  that  
468 corresponds to the growth without fragmentation; we denote this by  $q_{j,(j+1)}$ . The combined  
469 probability of all outcomes is equal to one:

$$\sum_{\kappa} q_{j,\kappa} = 1. \quad (13)$$

470 For deterministic life cycles, only one partition occurs in all groups in a population. Thus,  
471 for group sizes  $j$  up to maturity size  $m$ , the trivial partition occurs with probability one  
472 ( $q_{j,(j+1)} = 1$ ), while all other partitions have zero probability. Once the group grows from  
473 the maturity size, a certain non-trivial partition of  $j' \leq m + 1$  occurs with probability one. In  
474 a stochastic life cycle, more than one partition has non-zero probability at least at one group  
475 size. Therefore, the projection matrix is different from Eq. (5).

476 To show that stochastic life cycles are dominated by deterministic ones, we construct the  
477 projection matrix for an arbitrary stochastic life cycle. Groups grow by one cell at a time,  
478 thus no process can increase the size of group by more than one unit at once, so  $a_{i,j} = 0$  for  
479 all  $i > j + 1$ . Thus, the projection matrix may contain non-zero elements only in the upper  
480 right triangle (emergence of smaller groups during fragmentation), on the main diagonal  
481 (fragmentation, growth and death of clusters), and on the first lower subdiagonal (growth of  
482 clusters to sizes larger by one cell).

483 The first lower subdiagonal describes the rate of emergence of new larger groups in a  
484 result of group growth without fragmentation. These rates are equal to the product of the



485 basic growth rate and the probability of the group to grow:

$$a_{j+1,j} = j b_j q_{j,(j+1)}. \quad (14)$$

486 The upper right triangle of the matrix describes the emergence of new groups in a result of  
 487 fragmentation of larger groups. For a given partition  $\kappa$  and given size of the newborn group  
 488  $i$ , the rate of production of new groups is equal to the product of the fragmentation rate ( $j b'_j$ ),  
 489 the probability to fragment according to the given partition ( $q_{j,\kappa}$ ), and the number of groups  
 490 of given size produced in the act of fragmentation with this partition ( $\pi_i(\kappa)$ ). The value of an  
 491 element  $a_{i,j}$  in the upper left triangle is equal to the sum of rates provided by all partitions  
 492 available to groups of size  $j$ :

$$a_{i,j} = j b'_j \sum_{\kappa} q_{j,\kappa} \pi_i(\kappa). \quad (15)$$

493 The main diagonal  $a_{i,i}$  describes the changes in groups numbers due to growth and frag-  
 494 mentations as well as the death of groups. The first component of  $a_{i,i}$  is given by the fact that  
 495 once a group of size  $j$  grows or fragments, the number of groups of that size decreases. The  
 496 rates of decrease are equal to  $j b_j q_{j,(j+1)}$  due to the growth and  $j b'_j \sum_{\kappa} q_{j,\kappa}$  due to the fragmen-  
 497 tations. The second component is provided by the fragmentation with partition  $\kappa = j + 1$ ,  
 498 which produce groups of size equal to the size of parent. This leads to an increase in the num-  
 499 ber of groups of size  $j$  at rate  $j b'_j q_{j,j+1} \pi_j(j + 1)$ , where  $\pi_1(1 + 1) = 2$  and  $\pi_j(j + 1) = 1$  if  
 500  $j > 1$ . The last component of  $a_{i,i}$  comes from the death of groups, which leads to a decrease  
 501 in their number at rate  $d_j q_{j,(j+1)} + d'_j \sum_{\kappa} q_{j,\kappa}$ , where the first term describes the death rate in  
 502 the absence of the fragmentation and the second term describes the death rate of fragmenting  
 503 groups. Combined, the diagonal elements of projection matrix are

$$a_{j,j} = -j b_j q_{j,(j+1)} - j b'_j \sum_{\kappa} q_{j,\kappa} + j b'_j q_{j,j+1} \pi_j(j + 1) - d_j q_{j,(j+1)} - d'_j \sum_{\kappa} q_{j,\kappa}. \quad (16)$$

504 All elements of the projection matrix given by Eqs. (14)-(16) are linear with respect to  
 505 any probability  $q_{j,\kappa}$ . As shown in Pichugin et al. [2017], in this case the optimal life cycle is  
 506 always deterministic, independent of the parameter values, such as the fitness landscape and  
 507 the scenario of the fragmentation cost.

## 508 **A.2 Characteristic equation of a deterministic fragmentation mode**

509 Consider a deterministic fragmentation mode in which groups grow up to the maturity size  
 510  $m$  and once the next cell is born, fragment according to a partition  $\kappa \vdash j' \leq m + 1$ . The  
 511 corresponding projection matrix is an  $m \times m$  matrix of the form

$$A = \begin{pmatrix} -b_1 - d_1 & 0 & 0 & 0 & \cdots & mb'_m \pi_1(\kappa) \\ b_1 & -2b_2 - d_2 & 0 & 0 & \cdots & mb'_m \pi_2(\kappa) \\ 0 & 2b_2 & -3b_3 - d_3 & 0 & \cdots & mb'_m \pi_3(\kappa) \\ 0 & 0 & \ddots & \ddots & \ddots & \vdots \\ 0 & 0 & 0 & \cdots & (m-1)b_{m-1} & mb'_m \pi_m(\kappa) - mb'_m - d'_m \end{pmatrix}.$$

512 The population growth rate is given by the leading eigenvalue  $\lambda_1$  of  $A$ , i.e., the largest  
 513 solution of the characteristic equation

$$\det(A - \lambda \mathbf{I}) = 0. \quad (17)$$

514 By using a Laplace expansion along the last column of  $A - \lambda \mathbf{I}$ , we can rewrite the left hand  
 515 side of the above expression (i.e., the characteristic polynomial of  $A$ ) as

$$\begin{aligned} \det(A - \lambda \mathbf{I}) &= \sum_{i=1}^{m-1} (-1)^{i+m} mb'_m \pi_i(\kappa) M_{i,m} + \\ &\quad (-1)^{2m} (mb'_m \pi_m(\kappa) - mb'_m - d'_m - \lambda) M_{m,m} \\ &= \sum_{i=1}^m (-1)^{i+m} mb'_m \pi_i(\kappa) M_{i,m} - (mb'_m + d'_m + \lambda) M_{m,m} \end{aligned} \quad (18)$$

516 where  $M_{i,m}$  is the  $(i, m)$  minor of  $A - \lambda \mathbf{I}$ . For all  $i = 1, \dots, m$ , the minor  $M_{i,m}$  is the  
 517 determinant of a block diagonal matrix, and hence equal to the product of the determinants of  
 518 the diagonal blocks. Moreover, each diagonal block is either a lower triangular or an upper  
 519 triangular matrix, whose determinant is given by the product of the elements in their main  
 520 diagonals. We can then write

$$M_{i,m} = \prod_{j=1}^{i-1} (-jb_j - d_j - \lambda) \prod_{j=i}^{m-1} jb_j. \quad (19)$$

521 Substituting Eq. (18) and Eq. (19) into Eq. (17) and simplifying, we obtain

$$\begin{aligned} & (-1)^{m-1} \sum_{i=1}^m mb'_m \pi_i(\kappa) \prod_{j=1}^{i-1} (jb_j + d_j + \lambda) \prod_{j=i}^{m-1} jb_j \\ & - (-1)^{m-1} (mb'_m + d'_m + \lambda) \prod_{j=1}^{m-1} (jb_j + d_j + \lambda) = 0. \end{aligned}$$

522 Dividing both sides by

$$(-1)^m \prod_{j=1}^m jb_j,$$

523 we get

$$\begin{aligned} & \frac{mb'_m + d'_m + \lambda}{mb_m} \prod_{j=1}^{m-1} \left(1 + \frac{d_j + \lambda}{jb_j}\right) \\ & - \sum_{i=1}^m \frac{b'_m}{b_m} \pi_i(\kappa) \prod_{j=1}^{i-1} \left(1 + \frac{d_j + \lambda}{jb_j}\right) = 0. \end{aligned}$$

524 To move the first multiplier with  $\lambda$  into the product, we rewrite it as

$$\frac{mb'_m + d'_m + \lambda}{mb_m} = \left(1 + \frac{d_m + \lambda}{mb_m}\right) + \frac{m(b'_m - b_m) + d'_m - d_m}{mb_m}.$$

525 Thus,

$$\begin{aligned} & \prod_{j=1}^m \left(1 + \frac{d_j + \lambda}{jb_j}\right) + \frac{m(b'_m - b_m) + d'_m - d_m}{mb_m} \prod_{j=1}^{m-1} \left(1 + \frac{d_j + \lambda}{jb_j}\right) \\ & - \sum_{i=1}^m \frac{b'_m}{b_m} \pi_i(\kappa) \prod_{j=1}^{i-1} \left(1 + \frac{d_j + \lambda}{jb_j}\right) = 0. \end{aligned}$$

526 Simplifying this, we finally obtain that the characteristic equation (17) can be written as

$$F_{m+1}(\lambda) + \Delta_m F_m(\lambda) - \frac{b'_m}{b_m} \sum_{i=1}^m \pi_i(\kappa) F_i(\lambda) = 0, \quad (20)$$

527 where

$$F_i(\lambda) = \prod_{j=1}^{i-1} \left(1 + \frac{d_j + \lambda}{jb_j}\right). \quad (21)$$

528 and

$$\Delta_i = \frac{i(b'_i - b_i) + d'_i - d_i}{ib_i}. \quad (22)$$

529 Note that two transformations preserve Eq. (20):

$$\mathbf{d} \rightarrow \mathbf{d} - r, \quad \lambda_1 \rightarrow \lambda_1 + r, \quad d' \rightarrow d' - r, \quad r \leq \min(\mathbf{d}), \quad (23)$$

530 and

$$\mathbf{d} \rightarrow s\mathbf{d}, \quad \mathbf{b} \rightarrow s\mathbf{b}, \quad b' \rightarrow sb', \quad d' \rightarrow sd', \quad \lambda_1 \rightarrow s\lambda_1, \quad s > 0.$$

531 These transformations allow us to set  $b_1 = 1$  and  $\min(\mathbf{d}) = 0$  without loss of generality.

### 532 **A.3 Forbidden fragmentation modes**

533 For any fitness landscape, for any combination of the fragmentation delay, risk and fixed loss,  
 534 the fragmentation mode having two different subsets of offspring with the same combined  
 535 size is dominated. To prove this, we use approach similar to one used in Appendix E in  
 536 [Pichugin et al., 2017]. Consider positive integers  $m, j, k$  such that  $m + 1 \geq 2j + k$ , two  
 537 partitions  $\tau_1 \vdash j$  and  $\tau_2 \vdash j$  such that  $\tau_1 \neq \tau_2$ , and an arbitrary partition  $\phi \vdash k$ , and the  
 538 following three deterministic fragmentation modes:

- 539 1.  $\kappa_1 = \tau_1 + \tau_2 + \phi \vdash 2j + k \leq m + 1$ , whereby a complex fragments upon growth from  
 540 size  $m$  into a number of offspring given by partitions  $\tau_1, \tau_2$ , and  $\phi$ .
- 541 2.  $\kappa_2 = \tau_1 + \tau_1 + \phi \vdash 2j + k \leq m + 1$ , whereby a complex fragments upon growth from  
 542 size  $m$  into a number of offspring given by two partitions  $\tau_1$  and one partition  $\phi$ .
- 543 3.  $\kappa_3 = \tau_2 + \tau_2 + \phi \vdash 2j + k \leq m + 1$ , whereby a complex fragments upon growth from  
 544 size  $m$  into a number of offspring given by two partitions  $\tau_2$  and one partition  $\phi$ .

545 Denoting by  $\lambda(\kappa_i)$  the leading eigenvalue of the projection matrix induced by fragmenta-  
 546 tion mode  $\kappa_i$ , we can show that, for any fitness landscape, either  $\lambda(\kappa_1) \leq \lambda(\kappa_2)$  or  $\lambda(\kappa_1) \leq$   
 547  $\lambda(\kappa_3)$  holds. This means that a fragmentation mode with two different subsets of offspring  
 548 with the same combined size is dominated by a mode where one of these subsets repeats  
 549 twice, while another one is not present.

550 To prove the statement above, let us define the polynomial  $p_i(\lambda)$  as the left hand side of  
 551 Eq. (20) with  $\kappa = \kappa_i$ , so that  $\lambda(\kappa_i)$  is the largest root of  $p_i(\lambda)$ . We obtain

$$p_1(\lambda) = F_{m+1}(\lambda) + \Delta_m F_m(\lambda) - \frac{b'_m}{b_m} \left( \sum_{i=1}^m \pi_i(\tau_1) F_i(\lambda) + \sum_{i=1}^m \pi_i(\tau_2) F_i(\lambda) + \sum_{i=1}^m \pi_i(\phi) F_i(\lambda) \right) \quad (24a)$$

$$p_2(\lambda) = F_{m+1}(\lambda) + \Delta_m F_m(\lambda) - \frac{b'_m}{b_m} \left( 2 \sum_{i=1}^m \pi_i(\tau_1) F_i(\lambda) + \sum_{i=1}^m \pi_i(\phi) F_i(\lambda) \right) \quad (24b)$$

$$p_3(\lambda) = F_{m+1}(\lambda) + \Delta_m F_m(\lambda) - \frac{b'_m}{b_m} \left( 2 \sum_{i=1}^m \pi_i(\tau_2) F_i(\lambda) + \sum_{i=1}^m \pi_i(\phi) F_i(\lambda) \right). \quad (24c)$$

552 These polynomials satisfy the following two properties. First,

$$\lim_{\lambda \rightarrow \infty} p_i(\lambda) = \infty, \quad (25)$$

553 as the leading coefficient of the left hand side of Eq. (20) is given by  $(b_1 \cdot b_2 \cdot \dots \cdot b_m m!)^{-1}$ ,

554 which is always positive. Second,

$$p_1(\lambda) = \frac{p_2(\lambda) + p_3(\lambda)}{2}. \quad (26)$$

555 Evaluating Eq. (26) at  $\lambda(\kappa_1)$ , and since  $\lambda(\kappa_1)$  is a root of  $p_1(\lambda)$ ,  $p_1(\lambda(\kappa_1)) = 0$ , it then follows  
 556 that

$$p_2(\lambda(\kappa_1)) = -p_3(\lambda(\kappa_1)).$$

557 Hence, it must be that only one of the following three scenarios is satisfied: (i)  $p_2(\lambda(\kappa_1)) <$   
 558  $0 < p_3(\lambda(\kappa_1))$ , (ii)  $p_2(\lambda(\kappa_1)) = p_3(\lambda(\kappa_1)) = 0$ , or (iii)  $p_2(\lambda(\kappa_1)) > 0 > p_3(\lambda(\kappa_1))$ . If  
 559  $p_2(\lambda(\kappa_1)) < 0 < p_3(\lambda(\kappa_1))$ , and by virtue of Eq. (25) and Bolzano's theorem (if a continuous  
 560 function has values of opposite sign inside an interval, then it has a root in that interval),  $p_2(\lambda)$   
 561 has a root between  $\lambda(\kappa_1)$  and  $\infty$ . Therefore,  $\lambda(\kappa_1) \leq \lambda(\kappa_2)$  holds. Likewise, if  $p_2(\lambda(\kappa_1)) >$   
 562  $0 > p_3(\lambda(\kappa_1))$ , then  $\lambda(\kappa_1) \leq \lambda(\kappa_3)$  holds. Finally, if  $p_2(\lambda(\kappa_1)) = p_3(\lambda(\kappa_1)) = 0$ , then  
 563 both  $\lambda(\kappa_1) \leq \lambda(\kappa_2)$  and  $\lambda(\kappa_1) \leq \lambda(\kappa_3)$  hold. We conclude that either  $\lambda(\kappa_1) \leq \lambda(\kappa_2)$  or  
 564  $\lambda(\kappa_1) \leq \lambda(\kappa_3)$  must hold.

#### 565 **A.4 Optimal life cycles under large delay of fragmentation**

566 Consider the deterministic life cycle that follows partition  $\kappa$ . Its proliferation rate is given  
 567 by Eq. (8). Under fragmentation with delay, the birth rate at the fragmentation size changes

568 according to

$$\frac{1}{mb'_m} = \frac{1}{mb_m} + T. \quad (27)$$

569 At large delay  $T \gg \frac{1}{mb_m}$ ,  $b'_m$  can be approximated as

$$b'_m \approx \frac{1}{mT} \ll 1 \quad (28)$$

570 Thus,  $\Delta_m$  given by Eq. (22) can be approximated by:

$$\Delta_m = \frac{m(b'_m - b_m) + d'_m - d_m}{mb_m} \approx \frac{1}{b_m m T} - 1. \quad (29)$$

571 Therefore, Eq. (20) becomes:

$$F_{m+1}(\lambda) + \left( \frac{1}{b_m m T} - 1 \right) F_m(\lambda) - \frac{1}{b_m m T} \sum_{i=1}^m \pi_i(\kappa) F_i(\lambda) = 0, \quad (30)$$

572 The delay value  $T$  contribute to this equation only in a form of factor  $\frac{1}{T} \ll 1$ . To analyse the  
573 solutions of obtained equation, we first discard all terms containing  $\frac{1}{T}$  in Eq. (30) and get

$$F_{m+1}(\lambda) - F_m(\lambda) = 0,$$

574 Substituting the expression of  $F_i(\lambda)$  from Eq. (21) we get

$$\frac{d_m + \lambda}{mb_m} \prod_{j=1}^{m-1} \left( 1 + \frac{d_j + \lambda}{j b_j} \right) = 0. \quad (31)$$

575 We denote the solutions of this equation as  $\lambda^0$ . There are  $m$  solutions of this equation:

576 one solution  $\lambda_{m,m}^0 = -d_m$  and  $m - 1$  solutions in a form  $\lambda_{j,m}^0 = -(j b_j + d_j)$ , where

577  $j \in \{1, 2, \dots, m - 1\}$ . For any solution in a form  $\lambda_{j,m}^0 = -(j b_j + d_j)$ , we can find another

578 life cycle fragmenting already at size  $j < m$  for which the solution  $\lambda_{j,j}^0 = -d_j > \lambda_{j,m}^0$  exists.

579 Thus, the proliferation rate of the optimal life cycle must have the form  $\lambda^0 = -d_m + O\left(\frac{1}{T}\right)$ .

580 As a consequence, for high fragmentation delay, under the optimal life cycle, group fragments

581 after reaching the most protected state with the minimal  $d_j$ .

582 To find which of many fragmentation modes available to the group reproducing at the

583 most protected state is evolutionary optimal, we consider the first order approximation of the

584 growth rate given by

$$\lambda \approx \lambda^0 + \frac{1}{T} \lambda^1 = -d_m + \frac{1}{T} \lambda^1. \quad (32)$$

585 To find  $\lambda_1$  we substitute Eq. (32) into Eq. (30),

$$F_{m+1} \left( -d_m + \frac{1}{T} \lambda^1 \right) - F_m \left( -d_m + \frac{1}{T} \lambda^1 \right) + \frac{1}{b_m m T} \left[ F_m \left( -d_m + \frac{1}{T} \lambda^1 \right) - \sum_{i=1}^m \pi_i(\kappa) F_i \left( -d_m + \frac{1}{T} \lambda^1 \right) \right] = 0,$$

586 Then we use expressions of  $F_i(\lambda)$  from Eq. (21) and discard all terms smaller than  $\frac{1}{T}$

$$\frac{\lambda^1}{m b_m T} F_m(-d_m) + \frac{1}{b_m m T} \left[ F_m(-d_m) - \sum_{i=1}^m \pi_i(\kappa) F_i(-d_m) \right] = 0.$$

587 Thus,

$$\lambda^1 = \frac{\sum_{i=1}^m \pi_i(\kappa) F_i(-d_m)}{F_m(-d_m)} - 1.$$

588 In the optimal life cycle under high delay of fragmentation, groups fragment according to the  
589 partition that provides the highest value of  $\lambda^1$ .

590 For the special case of the constant death rate, the optimal life cycle can be found explic-  
591 itly. In this case, the death rate can be set to  $d = 0$  (see Eq. (23)), so

$$\lambda^1 = \frac{\sum_{i=1}^m \pi_i(\kappa) F_i(0)}{F_m(0)} - 1.$$

592 At  $d = 0$ ,  $F_i(0) = 1$ , so:

$$\lambda^1 = \sum_{i=1}^m \pi_i(\kappa) - 1,$$

593 the right hand side of this expression is the number of produced offspring groups minus one.  
594 This expression is maximized by the life cycle producing the maximal number of offspring  
595 groups, i.e. by the equal split life cycle producing only unicellular propagules.

596 For the set of random fitness landscapes used in section 3.2, the minimum of  $d_i$  is evenly  
597 distributed across all considered sizes  $\{1, 2, \dots, 19\}$ . Thus, at large delay, the size of frag-  
598 mentation should be evenly distributed as well, which corresponds to average fragmentation  
599 size equal to 10 and standard variation of sizes equal to  $\sqrt{30}$ . The mean and standard varia-  
600 tion of the observed distribution of fragmentation sizes quickly approach these values in our  
601 numerical simulations, cf. Fig. 3.

602 For the set of fitness landscapes detrimental to larger groups used in section 3.3, the  
 603 minimum of  $d_i$  is achieved always at  $d_1$ . Therefore, the maturity size for large delay is 1,  
 604 which corresponds to the unique fragmentation pattern  $1 + 1$ . In our simulations the initial  
 605 increase in  $T$  resulted in the gradual decrease of the fraction of fitness landscapes promoting  
 606  $1 + 1$  to zero. However, further increase of  $T$  make some fitness landscapes promote  $1 + 1$   
 607 again, and above some intermediary value of  $T$ , the fraction of fitness landscapes promoting  
 608  $1 + 1$  begin to increase, see Fig. 4a.

## 609 **A.5 Optimal life cycles under high risk of fragmentation**

610 Consider the deterministic life cycle that follows partition  $\kappa$ . It's proliferation rate is given  
 611 by Eq. (8). For fragmentation with risk, the death rate at the fragmentation size changes  
 612 according to

$$d'_i = d_i + R \quad (33)$$

613 Thus,  $\Delta_m$  given by Eq. (10) becomes

$$\Delta_m = \frac{m(b'_m - b_m) + d'_m - d_m}{mb_m} = \frac{R}{mb_m}. \quad (34)$$

614 Therefore, Eq. (8) becomes

$$F_{m+1}(\lambda) + \frac{R}{mb_m} F_m(\lambda) - \sum_{i=1}^m \pi_i(\kappa) F_i(\lambda) = 0, \quad (35)$$

615 Or, after dividing by  $R$ ,

$$\frac{1}{mb_m} F_m(\lambda) + \frac{1}{R} \left( F_{m+1}(\lambda) - \sum_{i=1}^m \pi_i(\kappa) F_i(\lambda) \right) = 0, \quad (36)$$

616 To analyse the solutions of obtained equation, we first discard all terms containing  $\frac{1}{R}$  and get

$$\frac{1}{mb_m} \prod_{j=1}^{m-1} \left( 1 + \frac{d_j + \lambda^0}{jb_j} \right) = 0, \quad (37)$$

617 For  $m > 1$ , this equation has  $m - 1$  solutions in a form  $\lambda^0 = -jb_j - d_j$ . Thus, the first  
 618 approximation of the proliferation rate, given by the maximal root of this equation, is equal  
 619 to

$$\lambda^0 = - \min_{0 < i < m} (ib_i + d_i).$$



620 For  $m = 1$ , this equation has no solution, instead the proliferation rate of the population  
 621 undergoing 1+1 life cycles (the only life cycle with  $m = 1$ ) is given by

$$\frac{1}{b_1}F_1(\lambda) + \frac{1}{R}(F_2(\lambda) - 2F_1(\lambda)) = \frac{1}{b_1} + \frac{1}{R} \left( \left( 1 + \frac{\lambda + d_1}{b_1} \right) - 2 \right) = 0,$$

622 Thus, for  $\kappa = 1 + 1$ , the proliferation rate is given by

$$\lambda_{1+1} = -R - d_1 + b_1 \ll -1$$

623 Thus, under high risk of fragmentation, the life cycle with  $\kappa = 1 + 1$  is dominated by any  
 624 other life cycle. Accordingly, in our simulations, the proportion of unicellular life cycles  
 625 monotonically decreases with the increase in  $R$ , see Figs. 3e) and 4. Therefore, according to  
 626 the approximation, natural selection promotes life cycles with maturity size  $m$  greater than  
 627 the critical value  $i^*$  minimizing expression  $ib_i + d_i$ .

628 To distinguish between such life cycles, we consider the first order approximation of the  
 629 growth rate given by

$$\lambda \approx \lambda^0 + \frac{1}{R}\lambda^1 = - \min_{0 < i < m} (ib_i + d_i) + \frac{1}{R}\lambda^1. \quad (38)$$

630 We substitute  $\lambda$  in the form of Eq. (38) into Eq. (36) and discard all terms smaller than  $\frac{1}{R}$

$$\frac{1}{mb_m} \frac{\lambda^1}{Ri^*b_{i^*}} \prod_{i \in (1, \dots, m-1) \setminus i^*} \left( 1 + \frac{\lambda^0 + d_i}{ib_i} \right) - \frac{1}{R} \sum_{i=1}^{i^*} \pi_i(\kappa) F_i(\lambda_0) = 0 \quad (39)$$

631 Note, that offspring groups of size larger than  $i^*$  do not contribute to sum at the end of the  
 632 expression at the left hand side, because  $F_{i > i^*}(\lambda^0) = 0$ . The term linear with respect to  $\frac{1}{R}$  is  
 633 equal to

$$\lambda^1 = mb_m i^* b_{i^*} \frac{\sum_{i=1}^{i^*} \pi_i(\kappa) F_i(\lambda^0)}{\prod_{i \in (1, \dots, m-1) \setminus i^*} \left( 1 + \frac{\lambda^0 + d_i}{ib_i} \right)} \quad (40)$$

634 The optimal life cycle maximizes this expression.

635 For any given maturity size  $m$ , the life cycle producing more offspring groups with size  
 636 not exceeding than  $i^*$  has higher  $\lambda^1$ . Thus, under the optimal life cycle, the size of offspring  
 637 cannot be larger than  $i^*$ .

638 For the special case where  $\mathbf{d} = 0$  and  $b_i$  does not decrease faster than  $i^{-1}$ , the sequence  
639  $ib_i + d_i$  monotonically increases. Hence,  $i^* = 1$ , so the optimal life cycle is the fragmentation  
640 into unicellular propagules.

641 For the set of random fitness landscapes used in section 3.2, the expression  $ib_i + d_i$  tend  
642 to grow with  $i$ , so its minimum  $i^*$  is more likely to be achieved at small values of  $i$ . Since,  $i^*$   
643 establishes an upper limit on the size of offspring groups, our analysis suggests that this size  
644 should decrease with  $R$ .

## 645 References

646 George E. Andrews. *The Theory of Partitions*. Cambridge University Press, Cambridge, UK,  
647 1998.

648 E.R. Angert. Alternatives to binary fission in bacteria. *Nature Reviews Microbiology*, 3(3):  
649 214–224, 2005.

650 E.R. Angert and R. M. Losick. Propagation by sporulation in the guinea pig symbiont  
651 metabacterium polyspora. *Proceedings of the National Academy of Sciences*, 95(17):10218  
652 – 10233, 1998.

653 C.B. Basbaum and W. Zena. Focalized proteolysis: spatial and temporal regulation of extra-  
654 cellular matrix degradation at the cell surface. *Current opinion in cell biology*, 8(5):731 –  
655 738, 1996.

656 H. Birkendal-Hansen. Proteolytic remodeling of extracellular matrix. *Current opinion in cell*  
657 *biology*, 7(5):728 – 735, 1995.

658 J.T. Bonner. *The Cellular Slime Molds*. Princeton University Press, Princeton, NJ, 1959.

659 J.T. Bonner. The origins of multicellularity. *Integrative Biology*, 1:27–36, 1998.

660 Hal Caswell. *Matrix population models*. Sinauer Associates, 2nd edition edition, 2001.

- 661 Dennis Claessen, Daniel E. Rozen, Oscar P. Kuipers, Lotte Sogaard-Andersen, and Gilles P.  
662 van Wezel. Bacterial solutions to multicellularity: a tale of biofilms, filaments and fruiting  
663 bodies. *Nat Rev Micro*, 12(2):115–124, 2014.
- 664 C. P. Davis and D. C. Savage. Habitat, succession, attachment, and morphology of seg-  
665 mented, filamentous microbes indigenous to the murine gastrointestinal tract. *Infection*  
666 *and immunity*, 10(4):948 – 956, 1974.
- 667 S. De Monte and P. B. Rainey. Nascent multicellular life and the emergence of individuality.  
668 *Journal of biosciences*, 39(2):237 – 248, 2014.
- 669 R. K. Grosberg and J. E. Strassmann. The evolution of multicellularity: A minor major  
670 transition? *Annual Review of Ecology, Evolution, and Systematics*, 38:621–54, 2007.
- 671 Katrin Hammerschmidt, Caroline J Rose, Benjamin Kerr, and P B Rainey. Life cycles, fitness  
672 decoupling and the evolution of multicellularity. *Nature*, 515(7525):75–79, 2014.
- 673 D. Kaiser. Building a multicellular organism. *Annual Review of Genetics*, 35(1):103–123,  
674 2001.
- 675 K. Kaveh, C. Veller, and M. A. Nowak. Games of multicellularity. *Journal of Theoretical*  
676 *Biology*, 403:143 – 158, 2016.
- 677 T. Koyama, M. Yamada, and M. Matsubashi. Formation of regular packets of staphylococcus  
678 aureus cells. *Journal of Bacteriology*, 129(3):1518 – 1523, 1977.
- 679 E. Libby, W. C. Ratcliff, M. Travisano, and B. Kerr. Geometry shapes evolution of early  
680 multicellularity. *PLoS Computational Biology*, 10(9):e1003803, 2014.
- 681 I. Lominski, J. Cameron, and G. Wyllie. Chaining and unchaining streptococcus faecalis—a  
682 hypothesis of the mechanism of bacterial cell separation. *Nature*, 181(4621):1477, 1958.
- 683 J. Maynard Smith and E. Szathmáry. *The major transitions in evolution*. W. H. Freeman,  
684 Oxford, 1995.

- 685 Diane McDougald, Scott A. Rice, Nicolas Barraud, Peter D. Steinberg, and Staffan Kjelle-  
686 berg. Should we stay or should we go: mechanisms and ecological consequences for  
687 biofilm dispersal. *Nat Rev Micro*, 10(1):39–50, 2012.
- 688 L. Mou, J.J. Sullivan, and G.R. Jago. Autolysis of streptococcus cremoris. *Journal of diary*  
689 *research*, 43(2):275 – 282, 1976.
- 690 W. L. Nicholson, N. Munakata, G. Horneck, H.J. Melosh, and P. Setlow. Resistance of  
691 bacillus endospores to extreme terrestrial and extraterrestrial environments. *Microbiology*  
692 *and Molecular Biology Reviews*, 64(3):548 – 572, 2000.
- 693 T. Pfeiffer and S. Bonhoeffer. An evolutionary scenario for the transition to undifferentiated  
694 multicellularity. *Proceedings of the National Academy of Sciences of the United States of*  
695 *America*, 100(3):1095–1098, 2003.
- 696 Y. Pichugin, J. Peña, P. Rainey, and A. Traulsen. Fragmentation modes and the evolution of  
697 life cycles. *PLoS Computational Biology*, 13(11):e1005860, 2017.
- 698 B. Purevdorj-Gage, J. W. Costerton, and P. Stoodley. Phenotypic differentiation and seeding  
699 dispersal in non-mucoid and mucoid pseudomonas aeruginosa biofilms. *Microbiology*, 151  
700 (5):1569 – 1576, 2005.
- 701 P. B. Rainey and B. Kerr. Cheats as first propagules: a new hypothesis for the evolution of  
702 individuality during the transition from single cells to multicellularity. *BioEssays*, 32(10):  
703 872 – 880, 2010.
- 704 P B Rainey and M Travisano. Adaptive radiation in a heterogeneous environment. *Nature*,  
705 394(6688):69–72, 1998.
- 706 W. C Ratcliff, R. F Denison, M Borrello, and M Travisano. Experimental evolution of multi-  
707 cellularity. *Proceedings of the National Academy of Sciences USA*, pages 1–6, Jan 2012.
- 708 W. C. Ratcliff, J. T. Pentz, and M. Travisano. Tempo and mode of multicellular adaptation in  
709 experimentally evolved *Saccharomyces cerevisiae*. *Evolution*, 67(6):1573–1581, 2013.

- 710 William C. Ratcliff, Johnathon D. Fankhauser, David W. Rogers, Duncan Greig, and Michael  
711 Travisano. Origins of multicellular evolvability in snowflake yeast. *Nature Communica-*  
712 *tions*, 6:6102, 2014.
- 713 R. Rippka, J. Deruelles, J.B. Waterbury, M. Herdmann, and R.Y. Stanier. Generic assign-  
714 ments, strain histories and properties of pure cultures of cyanobacteria. *Microbiology*, 111  
715 (1):1 – 61, 1979.
- 716 D. Roze and R. E. Michod. Mutation, multilevel selection, and the evolution of propagule  
717 size during the origin of multicellularity.”. *The American Naturalist*, 158(6):638 – 654,  
718 2001.
- 719 M.R. Shaikh and D.E.S. Stewart-Tull. Streptococcus faecalis chain disruption. *Microbiology*,  
720 91(1):195 – 197, 1975.
- 721 D.L. Shungu, J.B. Cornett, and G.D. Shockman. Morphological and physiological study of  
722 autolytic-defective streptococcus faecium strains. *Journal of Bacteriology*, 138(2):598 –  
723 608, 1979.
- 724 G.M. Smith. A comparative study of the species of volvox. *Transactions of the American*  
725 *Microscopical Society*, 63(4):265 – 310, 1944.
- 726 J.W. Soper and C.G. Winter. Role of cell wall autolysin in chain formation by a mutant strain  
727 of streptococcus faecalis. *Biochimica et biophysica acta (BBA) - General Subjects*, 297(2):  
728 333 – 342, 1973.
- 729 S. M. Stanley. An ecological theory for the sudden origin of multicellular life in the late  
730 precambrian. *Proceedings of the National Academy of Sciences*, 70(5):1486 – 1489, 1973.
- 731 Stephen C Stearns. *The evolution of life histories*. Oxford University Press, Oxford, 1992.
- 732 J. R. Stein. A morphologic and genetic study of *Gonium pectorale*. *American Journal of*  
733 *Botany*, 45:664–672, 1958.

- 734 Corina E. Tarnita, Clifford H. Taubes, and Martin A. Nowak. Evolutionary construction by  
735 staying together and coming together. *Journal of Theoretical Biology*, 320(0):10–22, 2013.
- 736 Tim Tolker-Nielsen, U. C. Brinch, P. C. Ragas, J. B. Andersen, C. S. Jacobsen, and S. Molin.  
737 Development and dynamics of pseudomonasp. biofilms. *Journal of bacteriology*, 182  
738 (22):6482 – 6489, 2000.
- 739 J. van Gestel and C. E. Tarnita. On the origin of biological construction, with a focus on mul-  
740 ticellularity. *Proceedings of the National Academy of Sciences*, 114(42):11018 – 11026,  
741 2017.
- 742 J.B. Waterbury and R.Y. Stanier. Patterns of growth and development in pleurocapsalean  
743 cyanobacteria. *Microbiological reviews*, 42(1):2, 1978.
- 744 J.S. Webb, M. Givskov, and S. Kjelleberg. Bacterial biofilms: prokaryotic adventures in  
745 multicellularity. *Current Opinion in Microbiology*, 6(6):578 – 585, 2003a.
- 746 J.S. Webb, L.S. Thompson, S. James, T. Charlton, T. Tolker-Nielsen, B. Koch, M. Givskov,  
747 and S. Kjelleberg. Cell death in pseudomonas aeruginosa biofilm development. *Journal of*  
748 *Bacteriology*, 185(15):4585 – 4592, 2003b.
